# Supplementary material
Source: PubMed Central journal article supplement (PMC9885138)
Supplement: NIHMS1864556-supplement-FSB222146-sup-0001-figs.pdf [file NIHMS1864556-supplement-FSB222146-sup-0001-figs.pdf]

# Supplemental figure 1

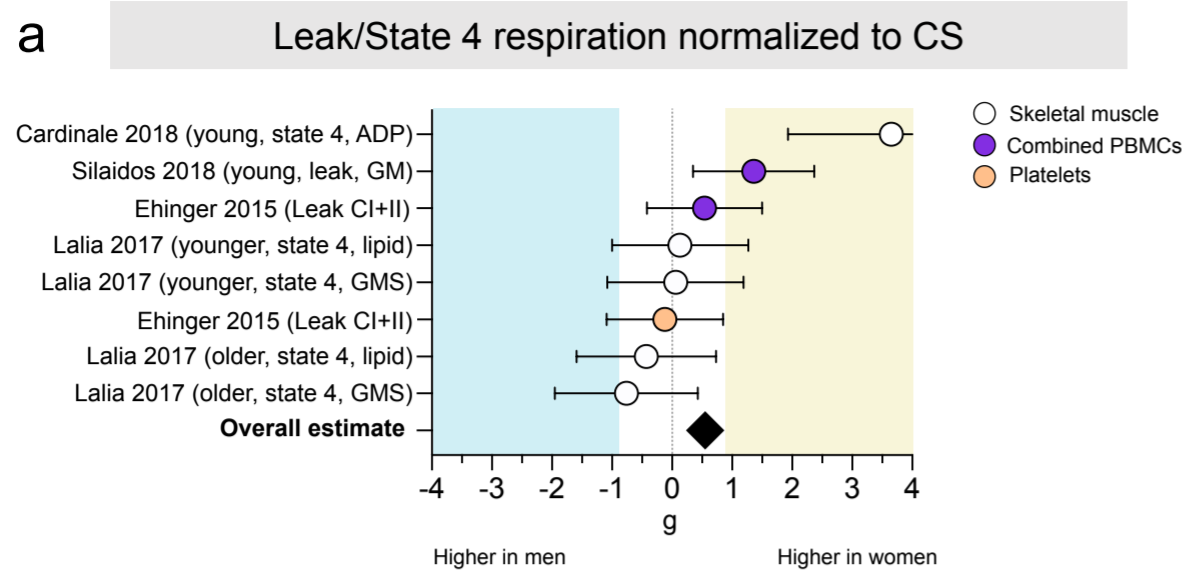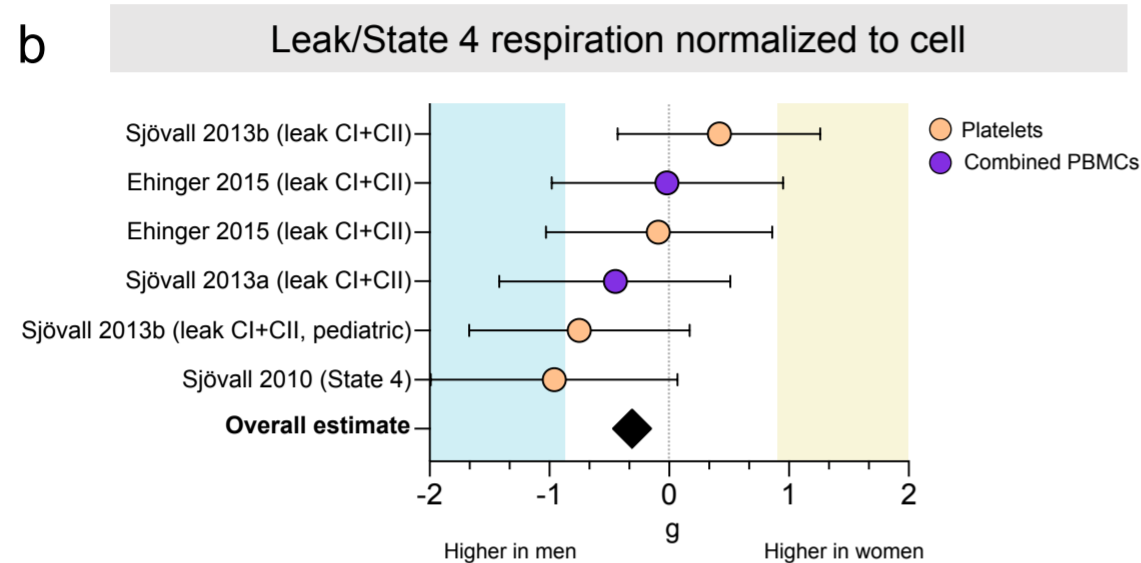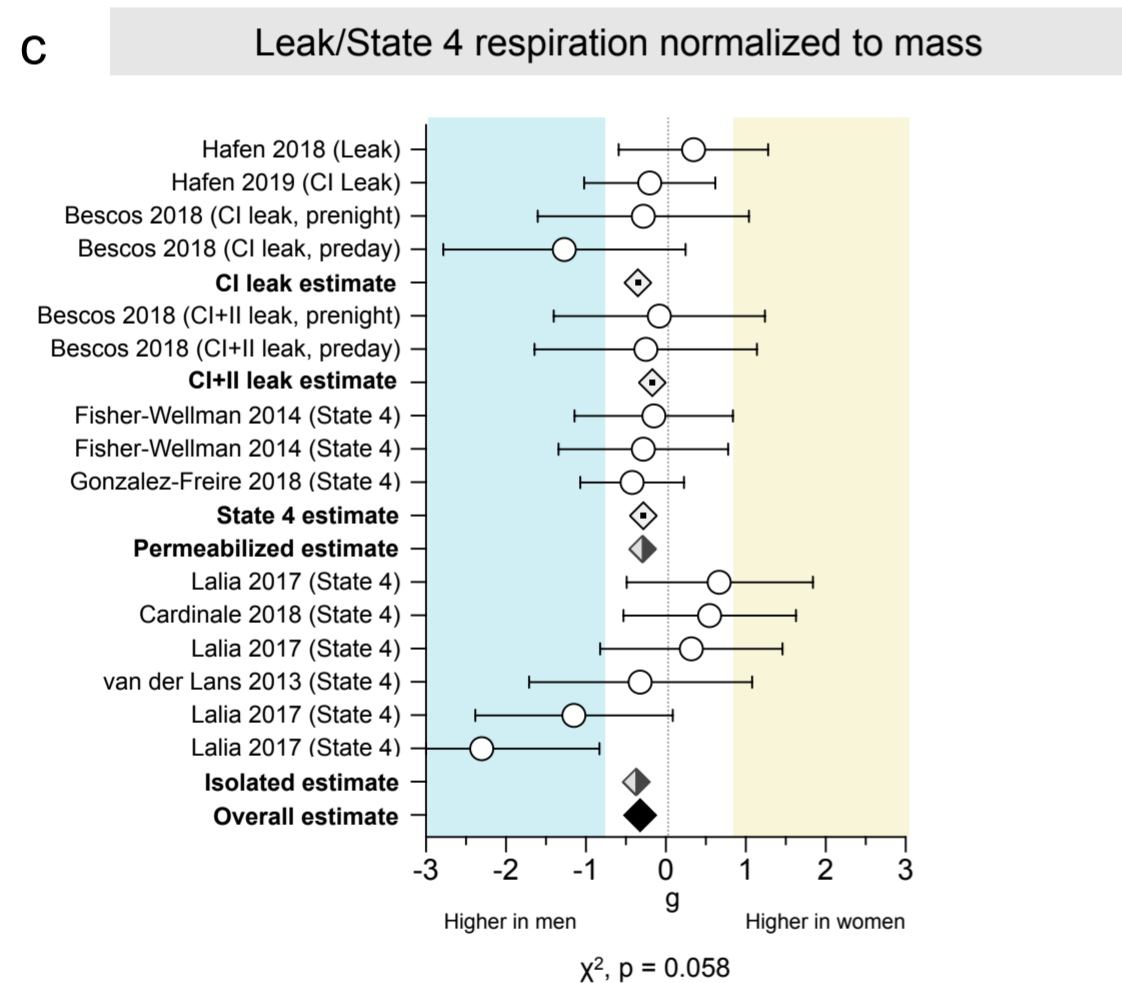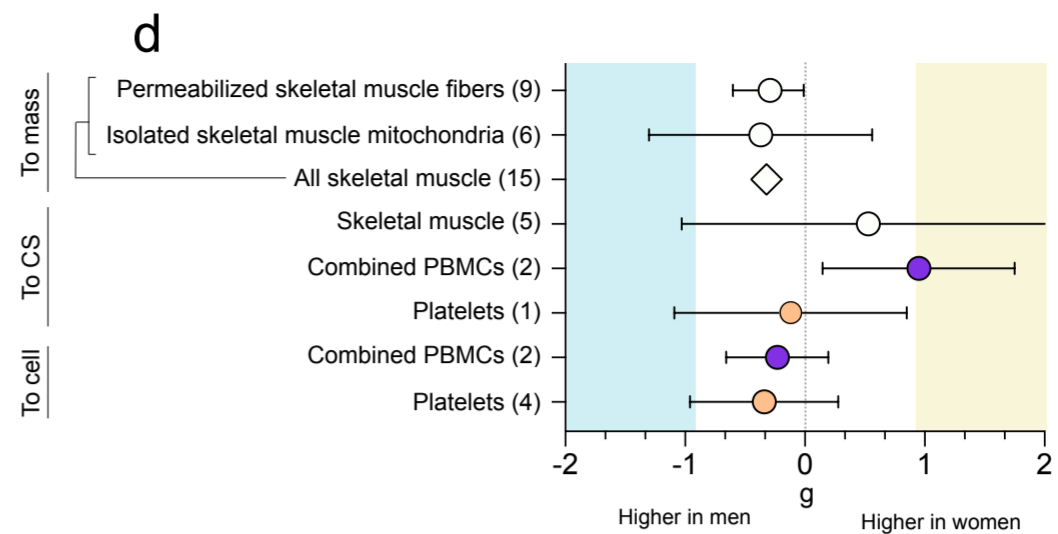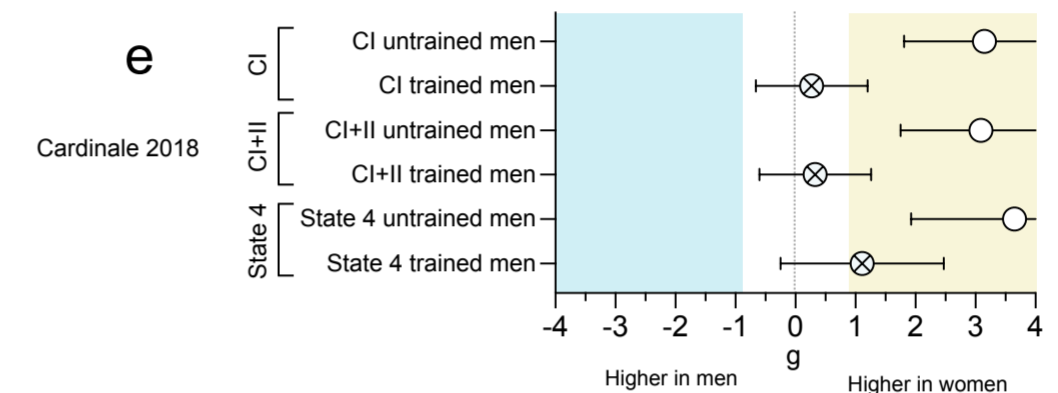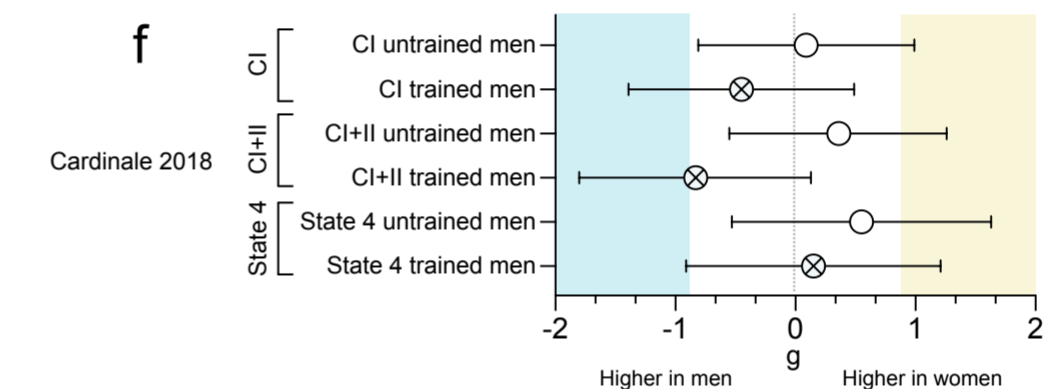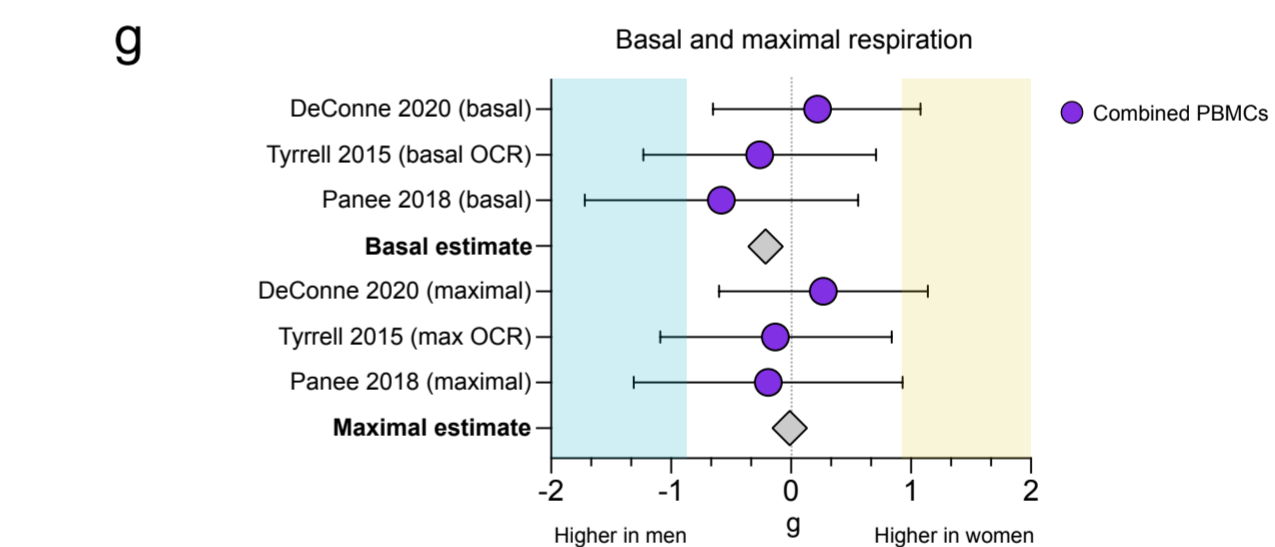

## Supplemental figure 1 – Leak/State 4 respiration does not demonstrate consistent binary sex differences.

Forest plots of standardized mean difference (Hedge's  $g$ ) and pooled effect estimate for Leak/State 4 mitochondrial respiration normalized to (a) CS, (b) cell, or (c) mass, ordered by effect size and color-coded by tissue. Values higher than zero indicate higher mean respiration in women, and values lower than zero indicate higher mean respiration in men. Study  $n$  (women and men combined) is noted in the table to the right of the plot. (d) Forest plot of average Leak/State 4 respiration per tissue, with number of measures noted to the left of the plot. Forest plots of standardized mean difference (Hedge's  $g$ ) and pooled effect estimate for CI, CI+II, and State 4 respiration in women compared to either trained or untrained men, normalized to (e) CS or (f) mass. (g) Forest plot of standardized mean difference (Hedge's  $g$ ) and pooled effect estimate for basal and maximal mitochondrial respiration, ordered by effect size and color-coded by tissue.
